# Supplementary material for: Modeling EPR parameters of nitrogen containing conjugated radical cations
Source: Royal Society of Chemistry journal article supplement (doi:10.1039/c5ra08758a), 2015-01-01

## Modeling EPR parameters of nitrogen containing conjugated radical cations

Laura Hermosilla, Paloma Calle, José Manuel García de la Vega

*Departamento de Química Física Aplicada, Facultad de Ciencias,  
Universidad Autónoma de Madrid, 28049 Madrid (Spain)*

### SUPPLEMENTARY INFORMATION:

|                                                                                                                                                                                                                                                  | <i>pg.</i> |
|--------------------------------------------------------------------------------------------------------------------------------------------------------------------------------------------------------------------------------------------------|------------|
| <b>Table S1.</b> Theoretical $a_{\text{iso}}(^1\text{H})$ of the conjugated radical cations at the following levels: PBE0/N07D, B3LYP/6-31G*, B3LYP/N07D, B3LYP/TZVP, and B3LYP/EPR-III .....                                                    | 2 - 4      |
| <b>Figure S1.</b> Plot of theoretical vs experimental $a_{\text{iso}}(^{14}\text{N})$ of the conjugated radical cations, calculated at the following levels: PBE0/N07D, B3LYP/6-31G*, B3LYP/N07D, B3LYP/TZVP, and B3LYP/EPR-III .....            | 5          |
| <b>Figure S2.</b> Plot of theoretical vs experimental $a_{\text{iso}}(^1\text{H})$ of the conjugated radical cations, calculated at the following levels: PBE0/N07D, B3LYP/6-31G*, B3LYP/N07D, B3LYP/TZVP, and B3LYP/EPR-III .....               | 6          |
| <b>Figure S3.</b> Absolute and relative deviation of the calculated $a_{\text{iso}}(^{14}\text{N})$ of the conjugated radical cations computed at the following levels: PBE0/N07D, B3LYP/6-31G*, B3LYP/N07D, B3LYP/TZVP, and B3LYP/EPR-III ..... | 7          |
| <b>Table S2.</b> Regression analysis for predictions of $^1\text{H}$ hfccs .....                                                                                                                                                                 | 8          |
| <b>Figure S4.</b> Plot of selected NBO of radicals <b>43</b> , <b>46</b> and <b>47</b> .....                                                                                                                                                     | 9          |
| <b>Figure S5.</b> Plot of N atomic contributions to positive density deformations of radicals <b>43</b> , <b>46</b> and <b>47</b> , computed at B3LYP/cc-pVTZ level of theory .....                                                              | 10         |
| <b>Figure S6.</b> Plot of spin densities of radicals <b>43</b> , <b>46</b> and <b>47</b> , computed at PBE0/N07D level of theory .....                                                                                                           | 11         |

**Table S1.** Theoretical isotropic hyperfine coupling constants (G) of  $^1\text{H}$  nuclei of the conjugated radical cations at the following levels: PBE0/N07D, B3LYP/6-31G\*, B3LYP/N07D, B3LYP/TZVP, and B3LYP/EPR-III. All calculations were carried out on the geometries optimized at B3LYP/6-31G\*.

| no. | nuclei                            | $a_{\text{iso}}$ (theoretical) |           |           |           |           | $a_{\text{iso}}$ (exptl.) <sup>a</sup> |
|-----|-----------------------------------|--------------------------------|-----------|-----------|-----------|-----------|----------------------------------------|
|     |                                   | PBE0                           | B3LYP     |           |           |           |                                        |
|     |                                   | N07D                           | 6-31G*    | N07D      | TZVP      | EPR-III   |                                        |
| 1   | H <sub>1</sub>                    | +1.3                           | +1.1      | +1.1      | +1.1      | +1.1      | 0.9                                    |
|     | H <sub>3,4</sub>                  | -2.8                           | -3.1      | -3.1      | -2.9      | -3.0      | 3.6                                    |
|     | 6H <sub>β</sub>                   | +15.8                          | +16.9     | +17.0     | +16.9     | +18.2     | 16.0                                   |
| 2   | H <sub>3,4</sub>                  | -3.0                           | -3.2      | -3.2      | -3.0      | -3.2      | 3.4                                    |
|     | 6H <sub>β</sub>                   | +15.4                          | +16.5     | +16.6     | +16.4     | +17.8     | 16.0                                   |
|     | 3H <sub>β'</sub>                  | -2.1                           | -1.9      | -1.9      | -1.9      | -2.0      | 1.5                                    |
| 3   | H <sub>1,4</sub>                  | -9.4                           | -10.3     | -10.1     | -9.7      | -9.8      | 7.94                                   |
|     | H <sub>2,3,5,6</sub>              | -3.3                           | -3.7      | -3.7      | -3.4      | -3.4      | 3.13                                   |
| 4   | H <sub>2,3,5,6</sub>              | -2.9                           | -3.2      | -3.2      | -2.9      | -3.0      | 2.85                                   |
|     | 6H <sub>β</sub>                   | +7.9                           | +8.5      | +8.3      | +8.1      | +8.8      | 8.03                                   |
| 5   | H <sub>1,4</sub>                  | -8.4                           | -9.1      | -8.9      | -8.6      | -8.6      | 7.17                                   |
|     | H <sub>2,3</sub>                  | -3.7                           | -4.0      | -4.0      | -3.7      | -3.8      | 3.99                                   |
|     | H <sub>5,8</sub>                  | -0.4                           | -0.5      | -0.5      | -0.5      | -0.5      | 0.75                                   |
|     | H <sub>6,7</sub>                  | -1.6                           | -1.7      | -1.7      | -1.6      | -1.7      | 1.38                                   |
| 6   | H <sub>2,3</sub>                  | -3.4                           | -3.8      | -3.7      | -3.4      | -3.5      | 3.70                                   |
|     | H <sub>5,8</sub>                  | -0.7                           | -0.7      | -0.7      | -0.7      | -0.7      | 0.92                                   |
|     | H <sub>6,7</sub>                  | -1.5                           | -1.6      | -1.6      | -1.5      | -1.6      | 1.42                                   |
|     | 6H <sub>β</sub>                   | +6.8                           | +7.1      | +7.0      | +6.9      | +7.4      | 6.90                                   |
| 7   | H <sub>1,5</sub>                  | -3.7                           | -4.2      | -4.1      | -3.9      | -3.9      | 3.37                                   |
|     | H <sub>2,6</sub>                  | -5.4                           | -5.6      | -5.5      | -5.2      | -5.4      | 4.64                                   |
|     | H <sub>3,7</sub>                  | -0.5                           | -0.7      | -0.7      | -0.7      | -0.8      | 1.08                                   |
|     | H <sub>4,8</sub>                  | -6.6                           | -6.9      | -6.8      | -6.2      | -6.4      | 6.25                                   |
| 8   | H <sub>2,6</sub>                  | -4.7                           | -4.9      | -4.9      | -4.5      | -4.7      | 4.34                                   |
|     | H <sub>3,7</sub>                  | -0.9                           | -1.1      | -1.1      | -1.1      | -1.1      | 1.30                                   |
|     | H <sub>4,8</sub>                  | -6.2                           | -6.6      | -6.5      | -5.9      | -6.1      | 6.02                                   |
|     | 6H <sub>β</sub>                   | +2.2                           | +2.4      | +2.3      | +2.3      | +2.4      | 2.21                                   |
| 9   | H <sub>1,4,5,8</sub>              | -0.3                           | -0.4      | -0.4      | -0.3      | -0.3      | 0.66                                   |
|     | H <sub>2,3,6,7</sub>              | -1.8                           | -1.9      | -1.9      | -1.8      | -1.9      | 1.71                                   |
|     | H <sub>9,10</sub>                 | -7.3                           | -7.9      | -7.8      | -7.4      | -7.5      | 6.49                                   |
| 10  | H <sub>1,4,5,8</sub>              | -0.4                           | -0.5      | -0.5      | -0.5      | -0.5      | 0.62                                   |
|     | H <sub>2,3,6,7</sub>              | -1.7                           | -1.8      | -1.8      | -1.7      | -1.8      | 1.38                                   |
|     | 6H <sub>β</sub>                   | +5.7                           | +5.9      | +5.9      | +5.8      | +6.3      | 6.20                                   |
| 11  | H <sub>3,3'</sub>                 | -1.1                           | -1.2      | -1.2      | -1.1      | -1.2      | 2.39 <sup>b</sup>                      |
|     | H <sub>4,4'</sub>                 | -2.1                           | -2.2      | -2.1      | -2.0      | -2.1      | 0.65 <sup>b</sup>                      |
|     | H <sub>5,5'</sub>                 | -3.1                           | -3.4      | -3.4      | -3.1      | -3.2      | 2.81                                   |
|     | H <sub>6,6'</sub>                 | +0.003                         | -0.1      | -0.1      | -0.1      | -0.1      | 0.23                                   |
|     | 2H <sub>β</sub>                   | +22.2                          | +23.7     | +23.4     | +22.7     | +24.4     | 24.24                                  |
| 12  | H <sub>3,3'</sub>                 | -0.6                           | -0.8      | -0.8      | -0.7      | -0.8      | 2.54 <sup>b</sup>                      |
|     | H <sub>4,4'</sub>                 | -2.7                           | -2.9      | -2.8      | -2.6      | -2.7      | 0.58 <sup>b</sup>                      |
|     | H <sub>5,5'</sub>                 | -2.8                           | -3.1      | -3.0      | -2.8      | -2.9      | 2.89                                   |
|     | H <sub>6,6'</sub>                 | -0.5                           | -0.6      | -0.6      | -0.5      | -0.5      | 0.36                                   |
|     | 2H <sub>β</sub> /2H <sub>β'</sub> | +1.3/+5.3                      | +1.4/+5.6 | +1.4/+5.5 | +1.4/+5.4 | +1.5/+5.8 | 6.98 <sup>c</sup>                      |
| 13  | H <sub>1,1'</sub>                 | -4.7                           | -5.2      | -5.0      | -4.8      | -4.9      | 4.06                                   |
|     | H <sub>2,2',6,6'</sub>            | -1.8                           | -2.0      | -2.0      | -1.8      | -1.8      | 1.61                                   |
|     | H <sub>3,3',5,5'</sub>            | -1.4                           | -1.6      | -1.5      | -1.4      | -1.4      | 1.45                                   |
| 14  | H <sub>2,2',6,6'</sub>            | -1.4                           | -1.6      | -1.6      | -1.5      | -1.5      | 1.33                                   |
|     | H <sub>3,3',5,5'</sub>            | -1.5                           | -1.7      | -1.6      | -1.5      | -1.5      | 1.57                                   |
|     | 6H <sub>β</sub>                   | +4.0                           | +4.2      | +4.1      | +4.0      | +4.4      | 3.99                                   |
| 15  | H <sub>1,3,6,8</sub>              | -2.3                           | -2.6      | -2.6      | -2.3      | -2.4      | 1.93                                   |
|     | H <sub>2,7</sub>                  | -5.4                           | -5.9      | -5.8      | -5.6      | -5.6      | 4.52                                   |
|     | H <sub>4,5,9,10</sub>             | -0.4                           | -0.4      | -0.4      | -0.4      | -0.4      | 0.41                                   |
| 16  | H <sub>1,3,6,8</sub>              | -2.0                           | -2.3      | -2.2      | -2.0      | -2.0      | 1.83                                   |
|     | H <sub>4,5,9,10</sub>             | -0.4                           | -0.4      | -0.4      | -0.3      | -0.3      | 0.40                                   |
|     | 6H <sub>β</sub>                   | +4.3                           | +4.6      | +4.5      | +4.4      | +4.8      | 4.39                                   |
| 17  | H <sub>1,3,4,6,7,9</sub>          | -7.3                           | -7.4      | -7.3      | -6.7      | -7.0      | 6.45                                   |
|     | H <sub>2,5,8</sub>                | +3.0                           | +2.6      | +2.5      | +2.3      | +2.4      | 1.78                                   |

**Table S1. (cont.)**

| no. | nuclei                             | $a_{\text{iso}}$ (theoretical) |           |           |           |           | $a_{\text{iso}}$ (exptl.) <sup>a</sup> |
|-----|------------------------------------|--------------------------------|-----------|-----------|-----------|-----------|----------------------------------------|
|     |                                    | PBE0                           | B3LYP     |           |           |           |                                        |
|     |                                    | N07D                           | 6-31G*    | N07D      | TZVP      | EPR-III   |                                        |
| 18  | H <sub>1,7</sub>                   | -3.2                           | -3.2      | -3.1      | -2.8      | -2.9      | 2.43                                   |
|     | H <sub>2,8</sub>                   | +1.8                           | +1.6      | +1.5      | +1.4      | +1.5      | 0.99                                   |
|     | H <sub>3,9</sub>                   | -3.9                           | -3.9      | -3.8      | -3.6      | -3.8      | 3.58                                   |
|     | H <sub>4,10</sub>                  | +2.0                           | +1.8      | +1.7      | +1.6      | +1.7      | 1.17                                   |
| 19  | H <sub>2,7</sub>                   | -4.5                           | -4.6      | -4.4      | -4.2      | <i>d</i>  | 3.94                                   |
|     | H <sub>3,8</sub>                   | +1.4                           | +1.2      | +1.1      | +1.0      | <i>d</i>  | 0.74                                   |
| 20  | H <sub>1,8</sub>                   | -1.2                           | -1.1      | -1.1      | -1.0      | -1.1      | 1.61                                   |
|     | H <sub>2,7</sub>                   | -0.6                           | -0.8      | -0.8      | -0.8      | -0.8      | 0.44                                   |
|     | H <sub>3,6</sub>                   | -3.1                           | -3.2      | -3.2      | -2.9      | -3.1      | 3.27                                   |
|     | H <sub>4,5</sub>                   | +1.0                           | +0.8      | +0.8      | +0.7      | +0.8      | 0.66                                   |
|     | H <sub>9</sub>                     | -8.8                           | -9.4      | -9.3      | -8.9      | -9.0      | 9.02                                   |
| 21  | H <sub>1,8</sub>                   | -0.9                           | -1.0      | -0.9      | -0.9      | <i>d</i>  | 1.14                                   |
|     | H <sub>2,7</sub> /H <sub>4,5</sub> | -0.5/+0.8                      | -0.7/+0.7 | -0.7/+0.6 | -0.7/+0.6 | <i>d</i>  | 0.49 <sup>c</sup>                      |
|     | H <sub>3,6</sub>                   | -2.5                           | -2.6      | -2.5      | -2.4      | <i>d</i>  | 2.50                                   |
|     | H <sub>9</sub>                     | -7.3                           | -7.9      | -7.8      | -7.4      | <i>d</i>  | 7.41                                   |
| 22  | H <sub>1,2</sub>                   | -4.1                           | -4.7      | -4.6      | -4.2      | -4.2      | 4.35                                   |
|     | 6H <sub>β</sub> /6H <sub>β</sub>   | +6.9/+8.3                      | +7.1/+8.8 | +7.1/+8.7 | +7.0/+8.7 | +7.6/+9.4 | 8.15 <sup>c</sup>                      |
| 23  | 12H <sub>β</sub>                   | +3.2                           | +3.4      | +3.4      | +3.3      | +3.6      | 3.28                                   |
|     | 12H <sub>β</sub>                   | +2.8                           | +3.1      | +3.0      | +3.0      | +3.2      | 2.84                                   |
| 24  | 2H <sub>α</sub>                    | -9.3                           | -10.0     | -9.8      | -9.6      | -9.5      | 9.58                                   |
|     | 2H <sub>o</sub>                    | -5.5                           | -5.6      | -5.5      | -5.0      | -5.2      | 5.82                                   |
|     | 2H <sub>m</sub>                    | +2.1                           | +1.7      | +1.6      | +1.4      | +1.5      | 1.52                                   |
|     | H <sub>p</sub>                     | -10.0                          | -10.2     | -10.2     | -9.3      | -9.8      | 9.58                                   |
| 25  | 2H <sub>α</sub>                    | -9.5                           | -10.0     | -9.9      | -9.6      | -9.5      | 10.23                                  |
|     | 2H <sub>o</sub>                    | -5.8                           | -5.7      | -5.7      | -5.3      | -5.5      | 6.42                                   |
|     | 2H <sub>m</sub>                    | +2.7                           | +2.2      | +2.2      | +2.0      | +2.1      | 2.06                                   |
| 26  | 2H <sub>o</sub>                    | -4.9                           | -4.9      | -4.8      | -4.4      | -4.6      | 5.21                                   |
|     | 2H <sub>m</sub>                    | +1.8                           | +1.4      | +1.3      | +1.2      | +1.2      | 1.36                                   |
|     | 6H <sub>β</sub>                    | +10.8                          | +11.1     | +11.2     | +11.0     | +11.9     | 12.22 <sup>b</sup>                     |
|     | 3H <sub>β</sub>                    | +11.0                          | +11.4     | +11.6     | +11.5     | +12.5     | 9.97 <sup>b</sup>                      |
| 27  | 4H <sub>α</sub>                    | -6.8                           | -7.4      | -7.2      | -7.0      | -7.0      | 5.88                                   |
|     | H <sub>2,3,5,6</sub>               | -1.8                           | -2.0      | -2.0      | -1.9      | -2.0      | 2.13                                   |
| 28  | 4H <sub>α</sub>                    | -5.9                           | -6.6      | -6.3      | -6.2      | -6.1      | 5.10                                   |
|     | 12H <sub>β</sub>                   | +1.2                           | +1.3      | +1.3      | +1.3      | +1.4      | 1.53                                   |
| 29  | 2H <sub>α</sub>                    | -5.9                           | -6.5      | -6.2      | -6.1      | -6.0      | 5.16                                   |
|     | H <sub>2,6</sub>                   | -2.5                           | -2.5      | -2.6      | -2.4      | -2.5      | 2.65                                   |
|     | H <sub>3,5</sub>                   | -1.0                           | -1.4      | -1.3      | -1.2      | -1.3      | 1.46                                   |
|     | 6H <sub>β</sub>                    | +8.1                           | +8.3      | +8.4      | +8.2      | +9.0      | 7.75                                   |
| 30  | H <sub>2,3,5,6</sub>               | -1.7                           | -1.9      | -1.9      | -1.8      | -1.8      | 1.98                                   |
|     | 12H <sub>β</sub>                   | +7.1                           | +7.3      | +7.4      | +7.2      | +7.8      | 6.74                                   |
| 31  | H <sub>3,6</sub>                   | +1.6                           | +1.2      | +1.6      | +1.0      | +1.4      | 0.34                                   |
|     | 12H <sub>β</sub>                   | +3.6                           | +4.2      | +3.8      | +4.1      | +4.0      | 3.76                                   |
|     | 12H <sub>β</sub>                   | +2.2                           | +3.7      | +2.3      | +3.5      | +2.5      | 2.56                                   |
| 32  | 4H <sub>arom</sub>                 | -1.7                           | -1.9      | -1.9      | -1.7      | -1.8      | 2.01                                   |
|     | 8H <sub>β</sub>                    | +9.9                           | +10.3     | +10.3     | +10.2     | +11.0     | 9.75                                   |
|     | 8H <sub>γ</sub>                    | -0.2                           | -0.1      | -0.1      | -0.1      | -0.2      | 0.17                                   |
| 33  | 12H <sub>β,ax</sub>                | +4.1                           | +4.4      | +4.3      | +4.2      | +4.6      | 4.22                                   |
|     | 12H <sub>β,eq</sub>                | +0.9                           | +0.9      | +0.9      | +0.9      | +1.0      | 0.97                                   |
| 34  | 24H <sub>β</sub>                   | +3.6                           | +2.9      | +2.9      | +2.8      | +3.0      | 2.81                                   |
| 35  | 4H <sub>α</sub>                    | -4.3                           | -4.7      | -4.6      | -4.5      | -4.4      | 3.97                                   |
|     | H <sub>2,2',6,6'</sub>             | -1.0                           | -1.1      | -1.2      | -1.1      | -1.1      | 1.08                                   |
|     | H <sub>3,3',5,5'</sub>             | -1.1                           | -1.3      | -1.3      | -1.2      | -1.2      | 1.62                                   |
| 36  | H <sub>2,2',6,6'</sub>             | -0.6                           | -0.8      | -0.8      | -0.7      | -0.8      | 0.73                                   |
|     | H <sub>3,3',5,5'</sub>             | -1.4                           | -1.5      | -1.5      | -1.4      | -1.4      | 1.65                                   |
|     | 12H <sub>β</sub>                   | +5.0                           | +5.1      | +5.2      | +5.1      | +5.5      | 4.70                                   |
| 37  | H <sub>α</sub>                     | -10.7                          | -11.0     | -11.0     | -10.6     | -10.7     | 10.98                                  |
|     | 2H <sub>o</sub> /2H <sub>o</sub>   | -3.8/-3.5                      | -3.7/-3.5 | -3.6/-3.3 | -3.4/-3.1 | -3.5/-3.2 | 3.46 <sup>c</sup>                      |
|     | 2H <sub>m</sub> /2H <sub>m</sub>   | +1.8/+2.0                      | +1.5/+1.7 | +1.5/+1.6 | +1.4/+1.5 | +1.4/+1.6 | 1.31 <sup>c</sup>                      |
|     | 2H <sub>p</sub>                    | -5.4                           | -5.5      | -5.4      | -5.0      | -5.2      | 4.86                                   |

**Table S1. (cont.)**

| no. | nuclei                           | $a_{\text{iso}}$ (theoretical) |           |           |           |           | $a_{\text{iso}}$ (exptl.) <sup>a</sup> |
|-----|----------------------------------|--------------------------------|-----------|-----------|-----------|-----------|----------------------------------------|
|     |                                  | PBE0                           | B3LYP     |           |           |           |                                        |
|     |                                  | N07D                           | 6-31G*    | N07D      | TZVP      | EPR-III   |                                        |
| 38  | H <sub>α</sub>                   | -9.8                           | -10.4     | -10.3     | -9.9      | -10.0     | 11.06                                  |
|     | H <sub>1,1'</sub>                | +1.9                           | +1.6      | +1.5      | +1.4      | +1.4      | 0.93                                   |
|     | H <sub>2,2'</sub>                | -5.1                           | -5.1      | -5.1      | -4.6      | -4.9      | 4.73                                   |
|     | H <sub>3,3'</sub>                | +1.5                           | +1.2      | +1.1      | +1.0      | +1.1      | 1.14                                   |
|     | H <sub>4,4'</sub>                | -3.3                           | -3.2      | -3.1      | -2.9      | -3.0      | 3.19                                   |
| 39  | 6H <sub>o</sub>                  | -2.5                           | -2.4      | -2.3      | -2.1      | -2.2      | 2.26                                   |
|     | 6H <sub>m</sub>                  | +1.7                           | +1.5      | +1.5      | +1.3      | +1.4      | 1.22                                   |
|     | 3H <sub>p</sub>                  | -3.6                           | -3.6      | -3.6      | -3.3      | -3.4      | 3.27                                   |
| 40  | H <sub>1,2</sub>                 | -5.2                           | -5.6      | -5.5      | -5.2      | -5.1      | 6.53                                   |
|     | H <sub>3,6</sub>                 | -1.9                           | -2.2      | -2.2      | -2.0      | -2.1      | 0.92                                   |
|     | H <sub>4,5</sub>                 | -5.3                           | -5.7      | -5.7      | -5.3      | -5.5      | 5.80                                   |
| 41  | H <sub>1,8</sub>                 | -1.6                           | -1.6      | -1.5      | -1.4      | -1.5      | 1.73                                   |
|     | H <sub>4,5</sub>                 | +0.9                           | +0.7      | +0.7      | +0.6      | +0.7      | 0.55                                   |
|     | H <sub>3,6</sub>                 | -2.4                           | -2.5      | -2.4      | -2.3      | -2.4      | 2.31                                   |
|     | 6H <sub>β</sub>                  | +7.5                           | +7.7      | +7.7      | +7.6      | +8.2      | 8.22                                   |
| 42  | 4H <sub>o</sub>                  | -1.9                           | -1.8      | -1.8      | -1.6      | -1.7      | 1.37                                   |
|     | 4H <sub>o</sub>                  | -1.6                           | -1.5      | -1.5      | -1.3      | -1.4      | 1.07                                   |
|     | 4H <sub>m</sub> /4H <sub>m</sub> | +1.3/+0.8                      | +1.1/+0.7 | +1.1/+0.7 | +1.1/+0.6 | +1.1/+0.7 | 0.48 <sup>c</sup>                      |
|     | 4H <sub>p</sub>                  | -2.3                           | -2.2      | -2.2      | -2.0      | -2.1      | 1.86                                   |
| 43  | H <sub>2,5,9,12</sub>            | +1.1                           | +1.1      | +1.1      | +1.1      | +1.2      | 0.62                                   |
|     | H <sub>3,4,10,11</sub>           | -1.5                           | -1.6      | -1.6      | -1.4      | -1.5      | 1.43                                   |
|     | H <sub>7,14</sub>                | +0.9                           | +0.8      | +0.7      | +0.6      | +0.6      | <0.1                                   |
|     | 2H <sub>β</sub>                  | +0.1                           | +0.1      | +0.1      | +0.1      | +0.1      | <0.1                                   |
| 44  | H <sub>2,5,9,12</sub>            | +1.6                           | +1.6      | +1.5      | +1.5      | +1.6      | 0.90                                   |
|     | H <sub>3,4,10,11</sub>           | -1.4                           | -1.5      | -1.5      | -1.3      | -1.4      | 1.45                                   |
|     | 4H <sub>β</sub>                  | +1.0                           | +1.0      | +1.1      | +1.0      | +1.2      | 0.76                                   |
| 45  | H <sub>2,12</sub>                | +1.4                           | +1.5      | +1.5      | +1.5      | +1.6      | 1.54                                   |
|     | H <sub>5,9</sub>                 | +1.6                           | +1.7      | +1.7      | +1.7      | +1.8      | 1.74                                   |
|     | H <sub>3,11</sub>                | -0.02                          | -0.01     | -0.01     | -0.02     | -0.02     | 2.03                                   |
|     | H <sub>4,10</sub>                | -0.1                           | -0.1      | -0.1      | -0.1      | -0.1      | 2.10 <sup>b</sup>                      |
|     | H <sub>7</sub>                   | -1.7                           | -1.8      | -1.7      | -1.7      | -1.8      | <0.05 <sup>b</sup>                     |
|     | H <sub>14</sub>                  | -1.9                           | -1.9      | -1.8      | -1.8      | -1.9      | 0.09                                   |
|     | 2H <sub>β</sub>                  | +19.9                          | +20.6     | +20.7     | +20.6     | +22.1     | 21.82                                  |
|     | 2H <sub>β</sub>                  | +0.5                           | +0.4      | +0.4      | +0.4      | +0.4      | 0.59                                   |
|     | H <sub>γ</sub>                   | -2.2                           | -2.2      | -2.2      | -2.1      | -2.3      | 2.46                                   |
|     | H <sub>γ</sub>                   | -1.2                           | -1.2      | -1.2      | -1.2      | -1.2      | 1.29                                   |
| 46  | H <sub>2,5,9,12</sub>            | +1.4                           | +1.4      | +1.5      | +1.5      | +1.6      | 1.54 <sup>e</sup>                      |
|     | H <sub>3,4,10,11</sub>           | -0.1                           | -0.3      | -0.2      | -0.2      | -0.1      | 1.88 <sup>b,e</sup>                    |
|     | H <sub>7,14</sub>                | -1.7                           | -1.6      | -1.6      | -1.6      | -1.7      | 0.12 <sup>b</sup>                      |
|     | 4H <sub>β</sub>                  | +6.4                           | +6.6      | +6.6      | +6.6      | +7.1      | 7.18 <sup>e</sup>                      |
|     | 4H <sub>γ</sub>                  | +0.7                           | +0.8      | +0.8      | +0.8      | +0.9      | 0.51 <sup>e</sup>                      |
| 47  | H <sub>2,5,9,12</sub>            | +1.6                           | +1.7      | +1.7      | +1.7      | +1.9      | 1.72                                   |
|     | H <sub>3,4,10,11</sub>           | -0.04                          | -0.03     | -0.03     | -0.03     | -0.03     | 1.89 <sup>b</sup>                      |
|     | H <sub>7,14</sub>                | -1.7                           | -1.7      | -1.6      | -1.6      | -1.7      | <0.2 <sup>b</sup>                      |
|     | 6H <sub>β</sub>                  | +11.3                          | +11.7     | +11.8     | +11.7     | +12.7     | 12.13                                  |
| 48  | 4H <sub>o</sub>                  | -2.3                           | -2.2      | -2.1      | -2.0      | -2.1      | 2.5                                    |
|     | 4H <sub>m</sub>                  | +1.2                           | +1.0      | +1.0      | +0.9      | +1.0      | 1.0                                    |
|     | 2H <sub>p</sub>                  | -3.4                           | -3.4      | -3.4      | -3.1      | -3.3      | 3.4                                    |
| 49  | 2H <sub>o</sub>                  | -1.9                           | -1.8      | -1.8      | +1.7      | -1.8      | 2.4                                    |
|     | 4H <sub>m</sub>                  | +0.7                           | +0.7      | +0.7      | +0.8      | +0.7      | 0.76                                   |
|     | 2H <sub>p</sub>                  | -3.1                           | -3.2      | -3.1      | -2.9      | -3.0      | 3.2                                    |
| 50  | 2H <sub>o</sub>                  | -2.4                           | -2.3      | -2.3      | -2.1      | -2.2      | 2.6                                    |
|     | 4H <sub>m</sub>                  | +1.1                           | +0.9      | +0.8      | +0.8      | +0.8      | 0.8                                    |
|     | 2H <sub>p</sub>                  | -3.6                           | -3.6      | -3.6      | -3.3      | -3.5      | 3.5                                    |
|     | 2H <sub>β,ax</sub>               | +4.6                           | +4.5      | +4.6      | +4.5      | +4.9      | 4.7                                    |
|     | 2H <sub>β,eq</sub>               | +1.8                           | +1.8      | +1.8      | -1.8      | +1.9      | 1.8                                    |

<sup>a</sup> The corresponding references are the same as those provided for <sup>14</sup>N nuclei in Table 1. <sup>b</sup> The assignment of the experimental hfccs to these nuclei is expected to be exchanged taking into account the present theoretical calculations. <sup>c</sup> Those nuclei have not been taken into consideration in the regression analysis because of uncertainty in the assignment. <sup>d</sup> EPR-III basis set is not parameterized for third row nuclei. <sup>e</sup> Averaged values for two pairs protons.

**Figure S1.** Plot of theoretical vs experimental  $a_{\text{iso}}(^{14}\text{N})$  of the conjugated radical cations, calculated at the following levels: PBE0/N07D, B3LYP/6-31G\*, B3LYP/N07D, B3LYP/TZVP, and B3LYP/EPR-III. (a) In the whole range; (b) in the range 0 – 10 G. Linear fits are represented by solid lines.

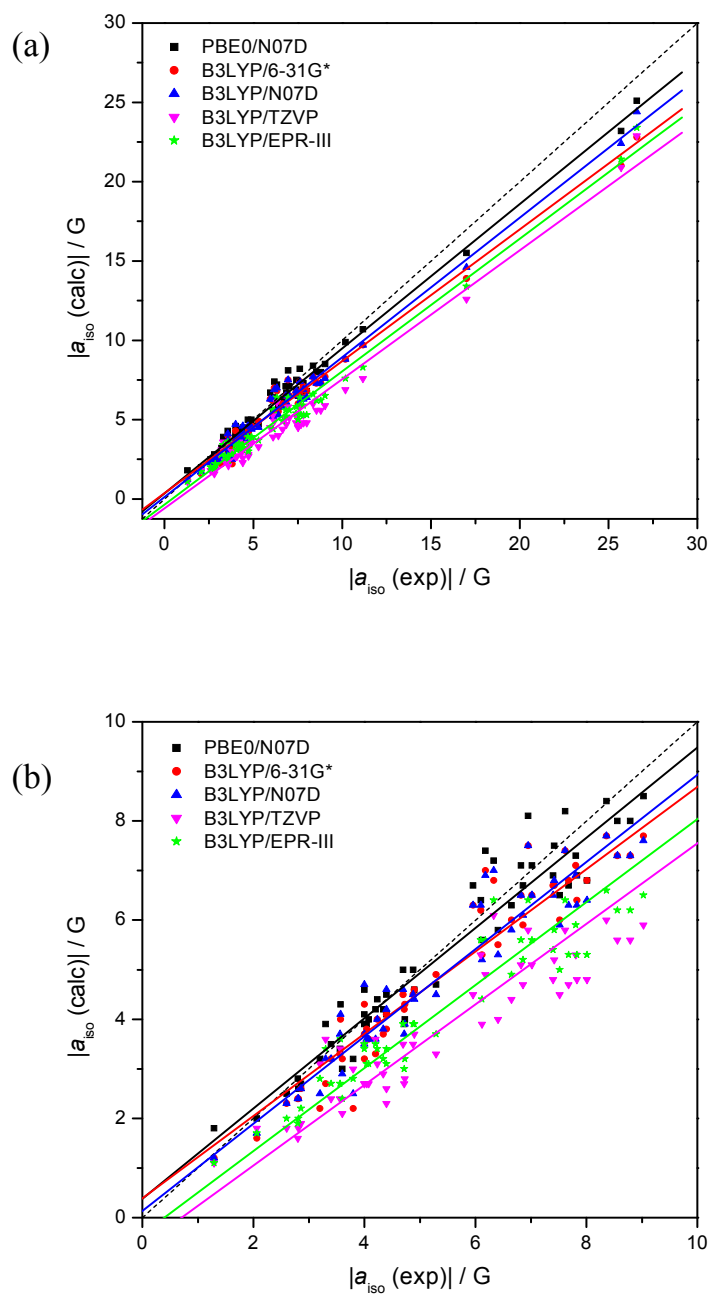

**Figure S2.** Plot of theoretical vs experimental  $a_{\text{iso}}(^1\text{H})$  of the conjugated radical cations, calculated at the following levels: PBE0/N07D, B3LYP/6-31G\*, B3LYP/N07D, B3LYP/TZVP, and B3LYP/EPR-III. (a) In the whole range; (b) in the range 0 – 14 G. Linear fits are represented by solid lines.

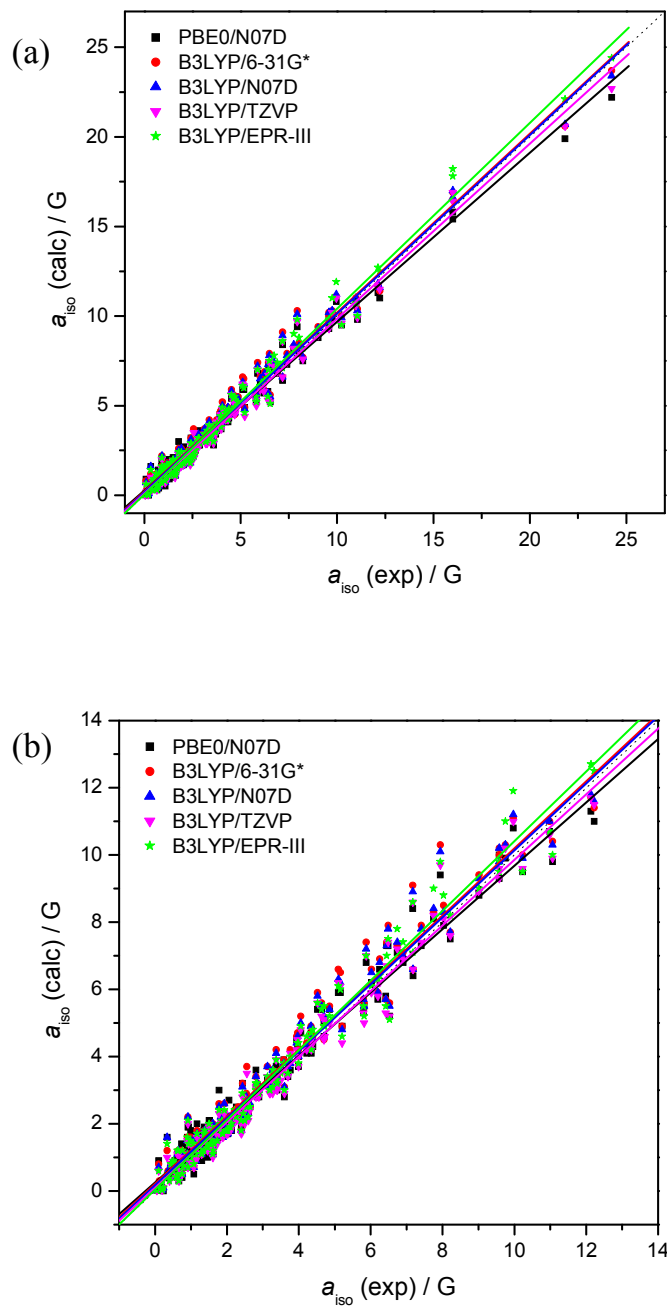

**Figure S3.** Absolute (top) and relative (bottom) deviation of the calculated  $a_{\text{iso}}(^{14}\text{N})$  of the conjugated radical cations computed at the following levels: PBE0/N07D, B3LYP/6-31G\*, B3LYP/N07D, B3LYP/TZVP, and B3LYP/EPR-III.

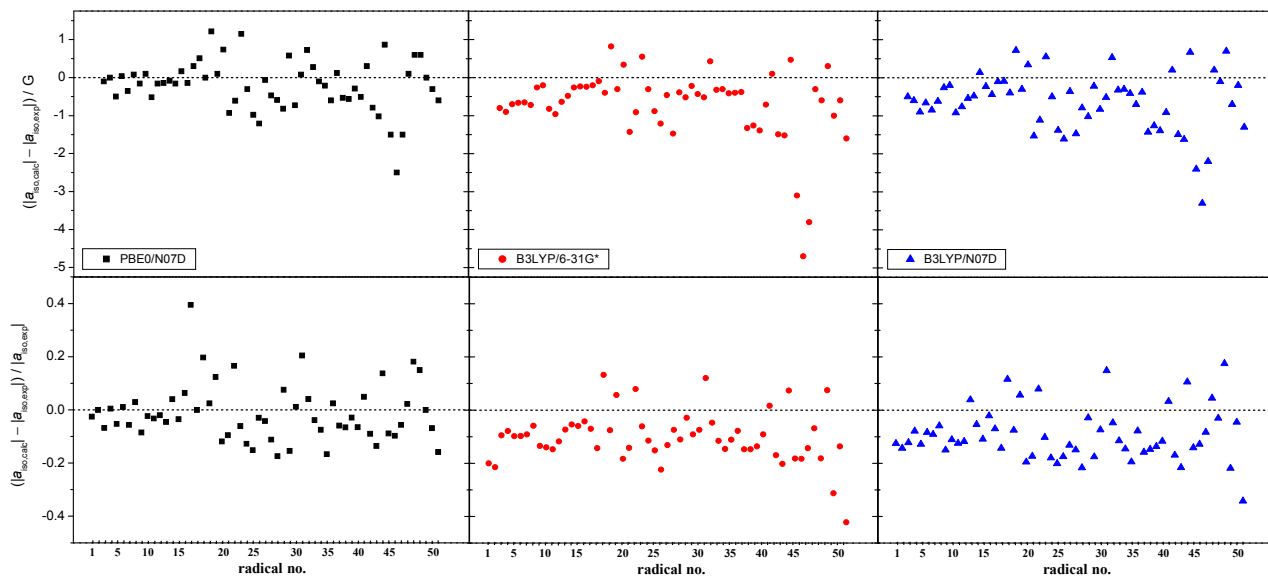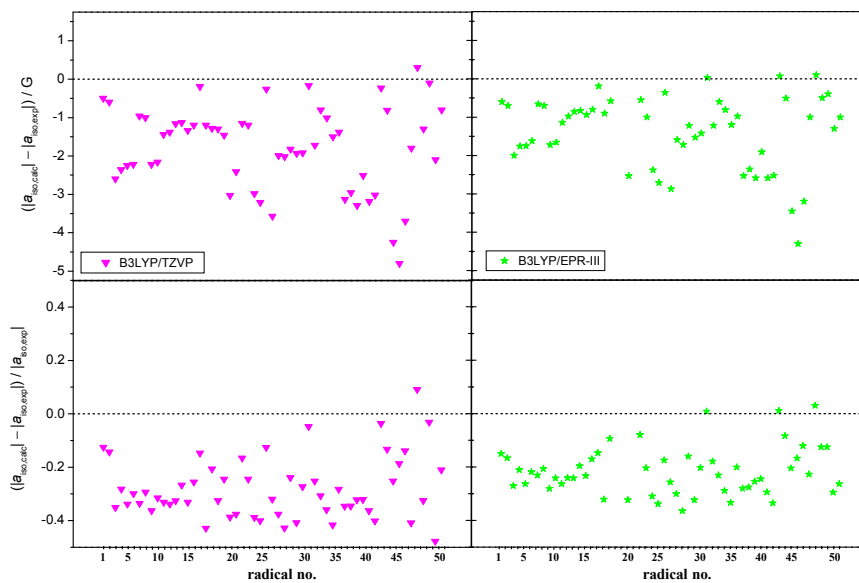

**Table S2.** Regression analysis for predictions of  $^1\text{H}$  hfccs (G).

| Level of theory | intercept | slope  | $R^2$  | $N$ | min   | max  | max.<br>absolute<br>error | MAD <sup>a</sup> | range/MAD |
|-----------------|-----------|--------|--------|-----|-------|------|---------------------------|------------------|-----------|
| PBE0/N07D       | 0.2459    | 0.9433 | 0.9819 | 165 | 0.003 | 22.2 | 2.0                       | 0.39             | 56.92     |
| B3LYP/6-31G*    | 0.2127    | 0.9983 | 0.9815 | 165 | 0.01  | 23.7 | 2.4                       | 0.40             | 59.25     |
| B3LYP/N07D      | 0.1704    | 0.9969 | 0.9832 | 165 | 0.01  | 23.4 | 2.2                       | 0.37             | 63.24     |
| B3LYP/TZVP      | 0.0896    | 0.9766 | 0.9838 | 165 | 0.02  | 22.7 | 1.8                       | 0.34             | 66.76     |
| B3LYP/EPR-III   | 0.0421    | 1.0370 | 0.9840 | 160 | 0.02  | 24.4 | 2.2                       | 0.37             | 65.95     |

<sup>a</sup>MAD (Mean Absolute Deviation) =  $\frac{1}{N} \sum_i^N |a_{iso}(calc) - a_{iso}(exp)|$ .



**Figure S4.** Plot of selected NBO of radicals **43** (top), **46** (center) and **47** (bottom), computed at B3LYP/cc-pVTZ//B3LYP/6-31G\* level of theory.

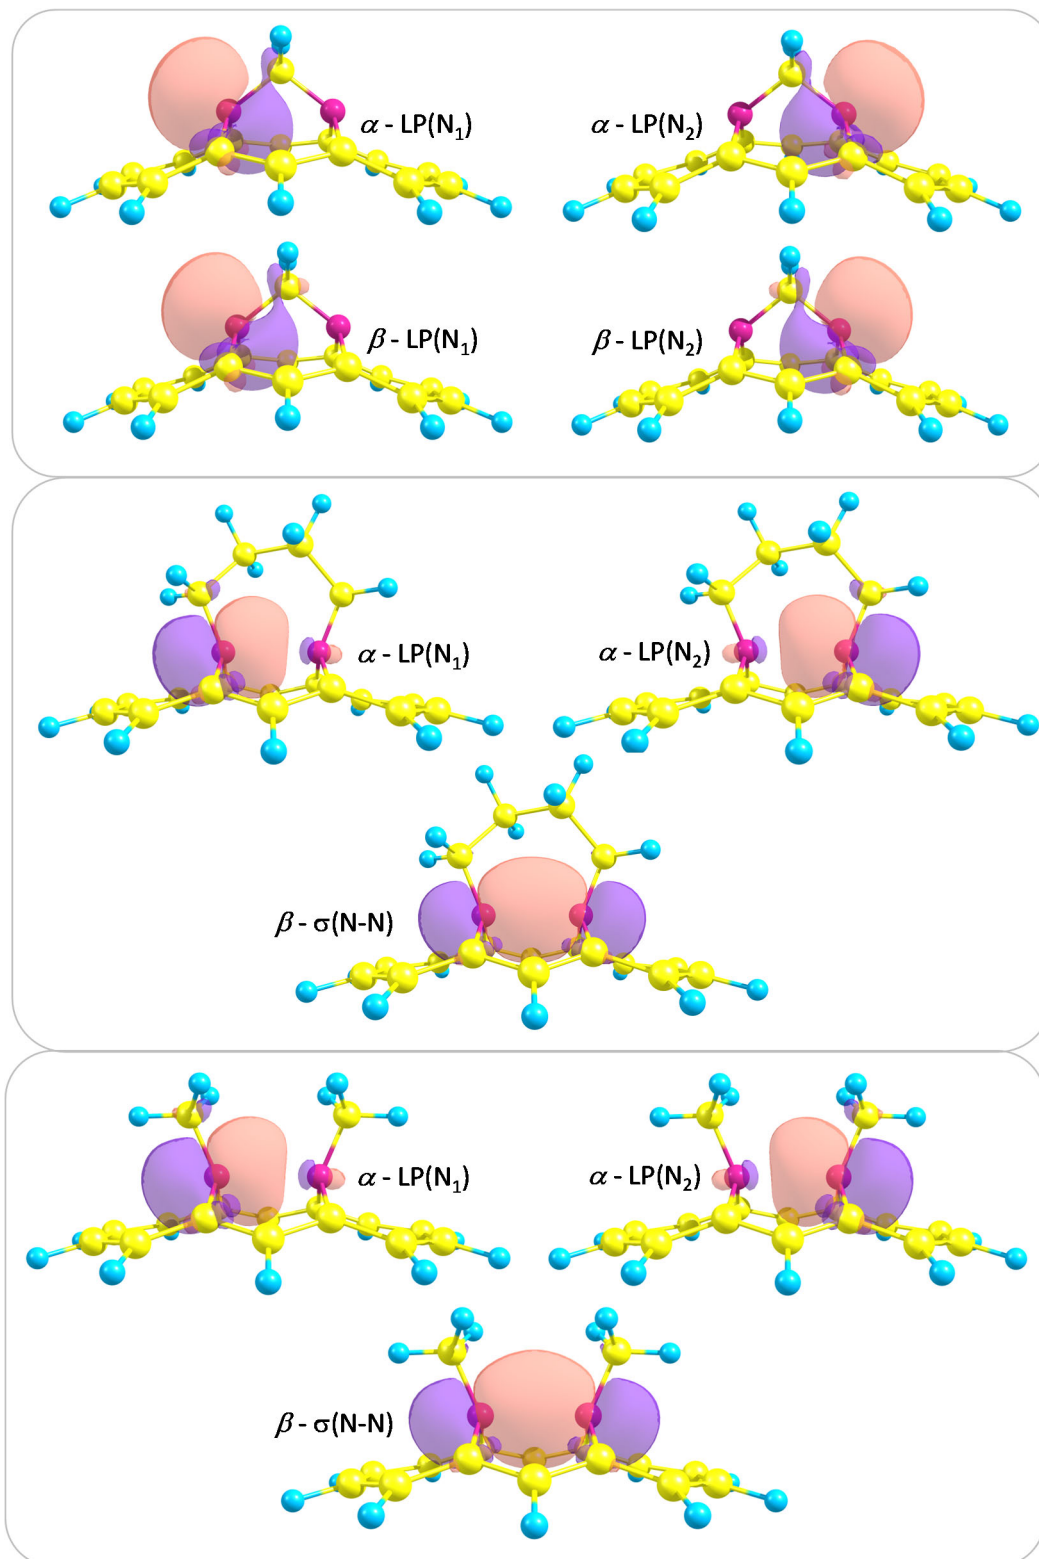

**Figure S5.** Plot of N atomic contributions to positive density deformations (contour = 0.001 a.u.) of radicals **43** (top), **46** (center) and **47** (bottom), computed at B3LYP/cc-pVTZ//B3LYP/6-31G\* level of theory.

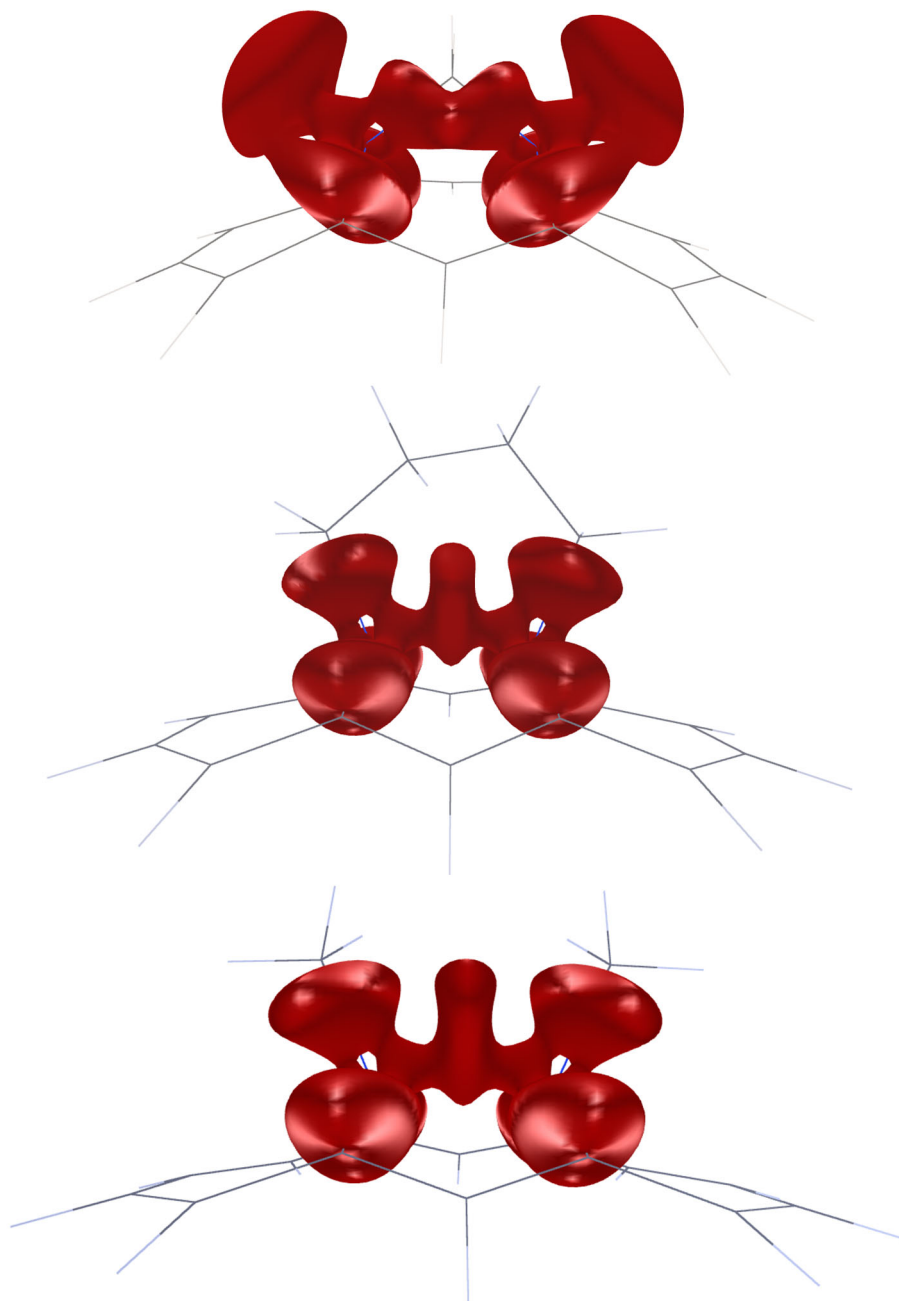

**Figure S6.** Plot of spin densities (contour = 0.005 a.u.) of radicals **43** (top), **46** (center) and **47** (bottom), computed at PBE0/N07D//B3LYP/6-31G\* level of theory.

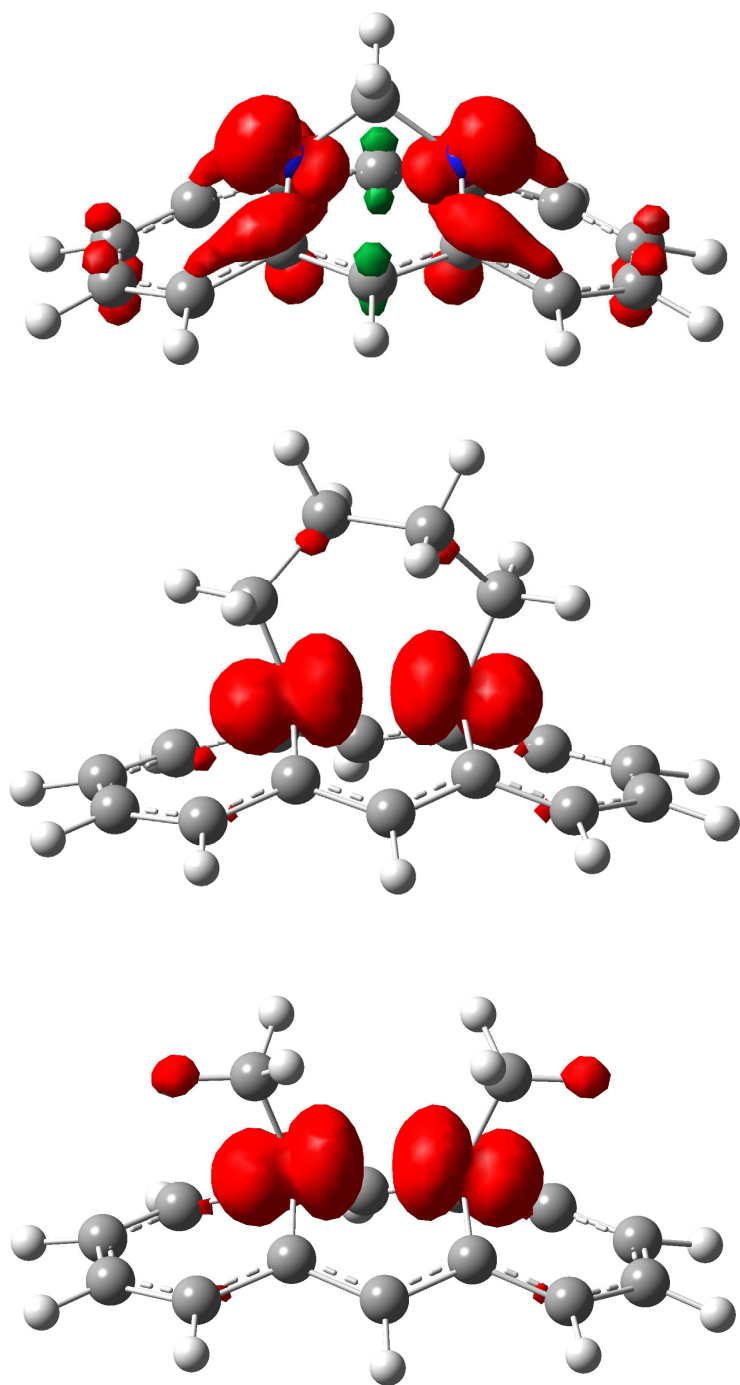

Supplement: c5ra08758a1.pdf [file c5ra08758a1.pdf]
